# Supplementary material
Source: PubMed Central journal article supplement (PMC3510545)

**a**

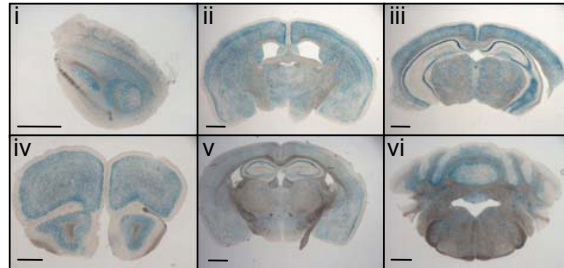

**b**

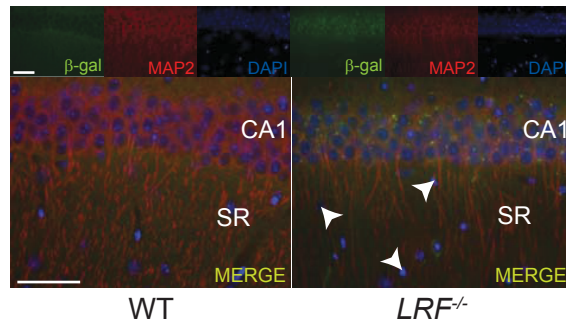

Supplement: MCB.01142-12_zmb999109779so1.pdf [file MCB.01142-12_zmb999109779so1.pdf]

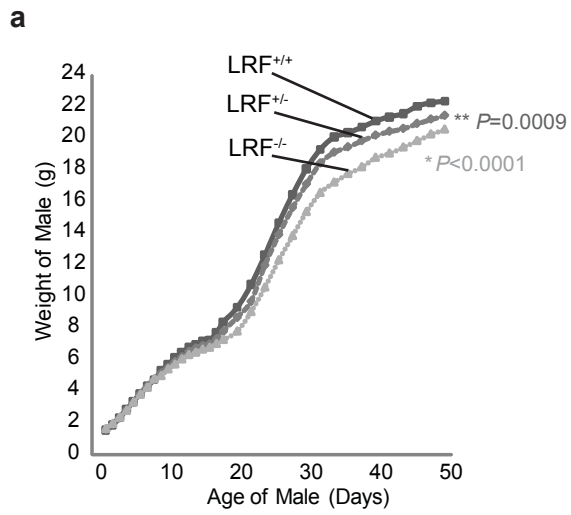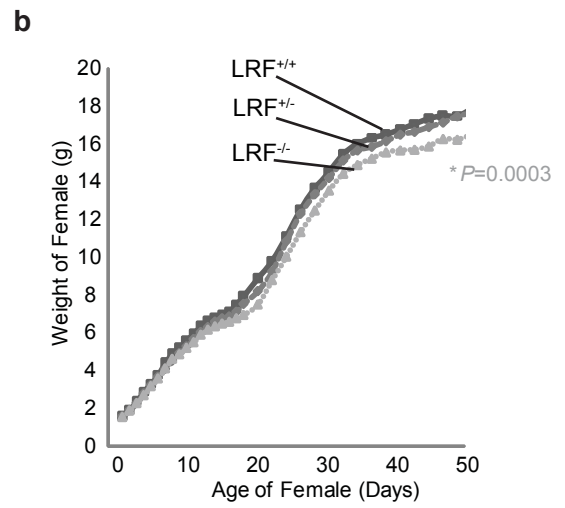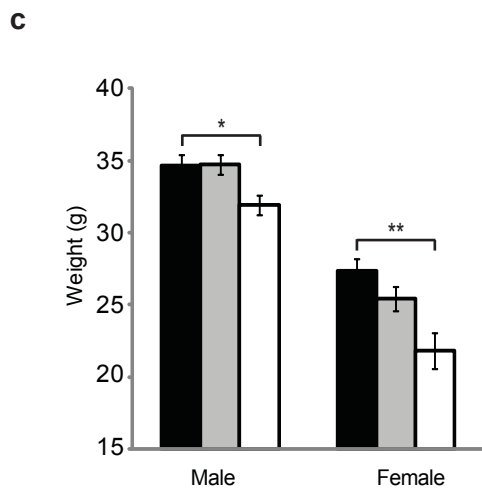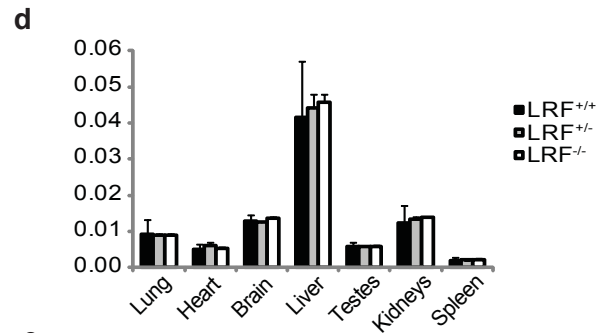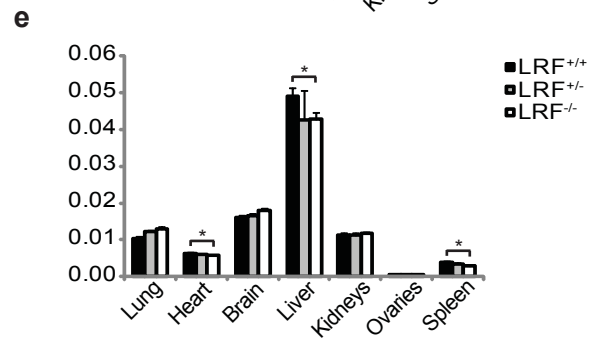

Supplement: MCB.01142-12_zmb999109779so2.pdf [file MCB.01142-12_zmb999109779so2.pdf]

**a**

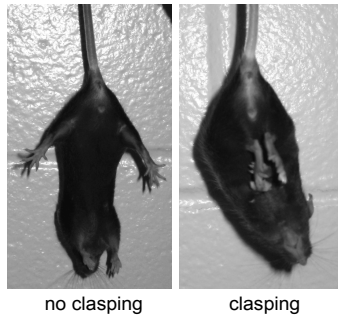

**b**

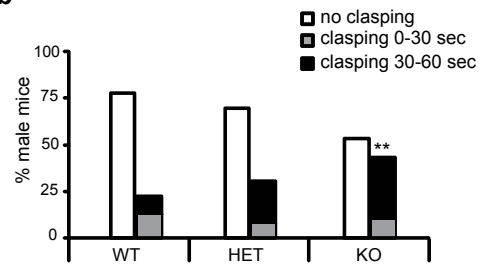

**c**

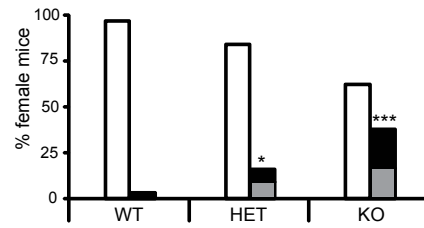

Supplement: MCB.01142-12_zmb999109779so3.pdf [file MCB.01142-12_zmb999109779so3.pdf]
